# Supplementary material
Source: PubMed Central journal article supplement (PMC2783200)
Supplement: NIHMS141534-supplement-Supplementary_file.pdf [file NIHMS141534-supplement-Supplementary_file.pdf]

## **Spatial link between nucleoli and expression of the *Zac1* gene**

Félix Royo, Nerea Paz, Luis Espinosa, Philip G. McQueen, Luciano Vellón, Luis A. Parada<sup>§</sup>

**FR, NP, LE, LV:** Cytogenomics, CIC bioGUNE-CIBEREHD, Par. Tec. Bizkaia  
Ed. 801 A, 48160- Derio, Spain

**PGMcQ:** Mathematical & Statistical Computing Laboratory, Division of  
Computational Bioscience, National Institutes of Health (CIT/NIH), 12 South  
Drive, Bethesda, MD 20892- 5620, USA

**LAP:** Cytogenomics, CIC bioGUNE-CIBEREHD, Par. Tec. Bizkaia Ed. 801 A,  
48160- Derio, Spain

Institute of Experimental Pathology, Faculty of Health Sciences, National  
University of Salta, Avda. Bolivia 5010, 4400-Salta, Argentina

<sup>§</sup>Corresponding author

Luis Antonio Parada

Cytogenomics - CIC bioGUNE

Par.Tec. Bizkaia, Ed. 801 A

48160- Derio

Spain

Tel. + 34 94 406 1317

Fax + 34 94 406 1301

Email: [lparada@cicbiogune.es](mailto:lparada@cicbiogune.es)

## Supplementary File 1

### Methyl Specific PCR (MSP) assay

Genomic analysis demonstrated that *Zac1* contains a CpG island in exon 1 which extends to the promoter region, suggesting that methylation is the mechanism for silencing *Zac1* maternal allele expression (Smith, et al. 2002). DNA was isolated from cell cultures using Wizard Genomic DNA purification kit (Promega) and transformed using the CpG Genome Modification kit according to manufacturer specifications (Chemicon). MSP primers were designed using MethPrimer software (<http://www.urogene.org/methprimer>) to detect differentially methylated CpGs of the *Zac1* gene promoter previously described (Kamiya, et al. 2000) (Suppl. Fig. 1a; Sequence accession number AF314094; Primer sequence in Table 1). Methyl specific PCR (MSP) assay was performed to detect differentially methylated CpGs of the *Zac1* gene promoter in the MEF cell line (G7) and neurons (Neu) from mouse embryos (16 dpc). PCR products characterization and semi quantitative estimation of their concentration was done by capillary electrophoresis in a 2100-Bioanalyzer (Agilent Technologies). The correct identity of PCR products were confirmed by DNA sequencing. MSP assay of chemically modified DNA from MEF cells and primary neurons showed that the CpGs of the promoter region exists in both methylated (M) and unmethylated (U) forms, suggesting that *Zac1* expression should be monoallelic in both cell types (Suppl. Fig. 1b). To control the completion of the bisulphate-mediated C> T conversion and primer specificity we performed the same experiments with unmethylated DNA generated by PCR. Briefly, mouse genomic DNA was amplified with primers designed for the whole sequence of the *Zac1* gene. The new and unmethylated PCR products were subjected to

bisulphate C> T conversion and then to MSP as described above (Suppl. Fig. 1c).

**Table 1. Details of the primers' sequences and annealing temperatures (T<sub>a</sub>) used in the different PCR reactions**

| Gene                                                  | Sequence                                                        | T <sub>a</sub> | Software designer/Source                                                                              |
|-------------------------------------------------------|-----------------------------------------------------------------|----------------|-------------------------------------------------------------------------------------------------------|
| <i>Zac1</i> :<br>Fragment5<br>primers for<br>RNA FISH | F 5'- TACTCCCCAGAATGGCTTTG-3'<br>R 5'- CTTCCGCTTCCTCTTCCTCT-3'  | 55°C           | Primer3<br>( <a href="http://primer3.sourceforge.net/">http://primer3.sourceforge.net/</a> )          |
| <i>Zac1</i> :<br>Fragment4<br>primers for<br>RNA FISH | F 5'- GGAAAACAGGAATGGGGTTT -3'<br>R 5'- TCCCCTTCCTAGGCTACACA-3' | 55°C           | Primer3<br>( <a href="http://primer3.sourceforge.net/">http://primer3.sourceforge.net/</a> )          |
| <i>Sf3b5</i> :<br>Primers for<br>RNA FISH             | F 5'- GGAGGATTCGGAACAAGTCA -3'<br>R 5'- CCATCACTCTCGTGCAGTCT-3' | 55°C           | Primer3<br>( <a href="http://primer3.sourceforge.net/">http://primer3.sourceforge.net/</a> )          |
| <i>Zac1</i> :<br>primers for<br>MSP                   | <u>Methylated CpG</u><br>F 5'- GTAGTTATTTTTTTGGTTGGCGT-<br>3'   | 55°C           | MethPrimer<br>( <a href="http://www.urogen.e.org/methprimer">http://www.urogen.e.org/methprimer</a> ) |

|                                            |                                                                                                                                           |      |                                                                                                                       |
|--------------------------------------------|-------------------------------------------------------------------------------------------------------------------------------------------|------|-----------------------------------------------------------------------------------------------------------------------|
|                                            | R 5'- CCCGACTAAATCAAAACTCGA-3'<br><br><u>Unmethylated CpG</u><br><br>F 5'- GTTATTTTTTTGGTTGGTGT-3'<br><br>R 5'- CCCAACTAAATCAAAACTCAAA-3' | 55°C |                                                                                                                       |
| <i>Zac1</i> :<br>primers for<br>qRT-PCR    | F 5'-AATGTGGCAAGTCCTTCGTC-3'<br>R 5'-CTTTGCCCACTCAGCCTTC-3'                                                                               | 55°C | Primer3<br><a href="http://primer3.sourceforge.net/">(http://primer3.sourceforge.net/)</a>                            |
| rRNA:<br>primers for<br>qRT-PCR            | F 5'-CGCGTCGTTGCTCACTCTTA-3'<br>R 5'-CCATTCGCCATGAATGTCC-3'                                                                               | 55°C | Primer3<br><a href="http://primer3.sourceforge.net/">(http://primer3.sourceforge.net/)</a><br><br>(Kass, et al. 1987) |
| <i>α-Actin</i> :<br>primers for<br>qRT-PCR | F 5'-CGCGTCCACCCGCGAG-3'<br>R 5'-CCTGGTGCCTAGGGCG-3'                                                                                      | 60°C | Primer3<br><a href="http://primer3.sourceforge.net/">(http://primer3.sourceforge.net/)</a>                            |
| <i>Gapdh</i> :<br>primers for<br>qRT-PCR   | F 5'-AACGACCCCTTCATTGAC-3'<br>R 5'-TCCACGACATACTCAGCAC-3'                                                                                 | 55°C | (Simpson, et al. 2000)                                                                                                |
| <i>Sf3b5</i><br>primers for                | F 5'- GGAGCATCTGCAGTCCAAGT-3'<br>R 5'- GGCCCATGTAGGAGCAGTAG-3'                                                                            | 55°C | Primer3<br><a href="http://primer3.sourceforge.net/">(http://primer3.sourceforge.net/)</a>                            |

|         |  |  |                                                |
|---------|--|--|------------------------------------------------|
| qRT-PCR |  |  | <a href="http://ceforge.net/">ceforge.net/</a> |
|---------|--|--|------------------------------------------------|

Kamiya M, Judson H, Okazaki Y, Kusakabe M, Muramatsu M, Takada S, Takagi N, Arima T, Wake N, Kamimura K, Satomura K, Hermann R, Bonthron DT, Hayashizaki Y (2000) The cell cycle control gene ZAC/PLAGL1 is imprinted--a strong candidate gene for transient neonatal diabetes. Hum Mol Genet 9: 453-460.

Kass S, Craig N, Sollner-Webb B (1987) Primary processing of mammalian rRNA involves two adjacent cleavages and is not species specific. Mol Cell Biol 7: 2891-2898.

Simpson DA, Feeney S, Boyle C, Stitt AW (2000) Retinal VEGF mRNA measured by SYBR green I fluorescence: A versatile approach to quantitative PCR. Mol Vis 6: 178-183.

Smith RJ, Arnaud P, Konfortova G, Dean WL, Beechey CV, Kelsey G (2002) The mouse Zac1 locus: basis for imprinting and comparison with human ZAC. Gene 292: 101-112.
