# Supplementary material
Source: PubMed Central journal article supplement (PMC2783200)

Suppl. Fig. 1

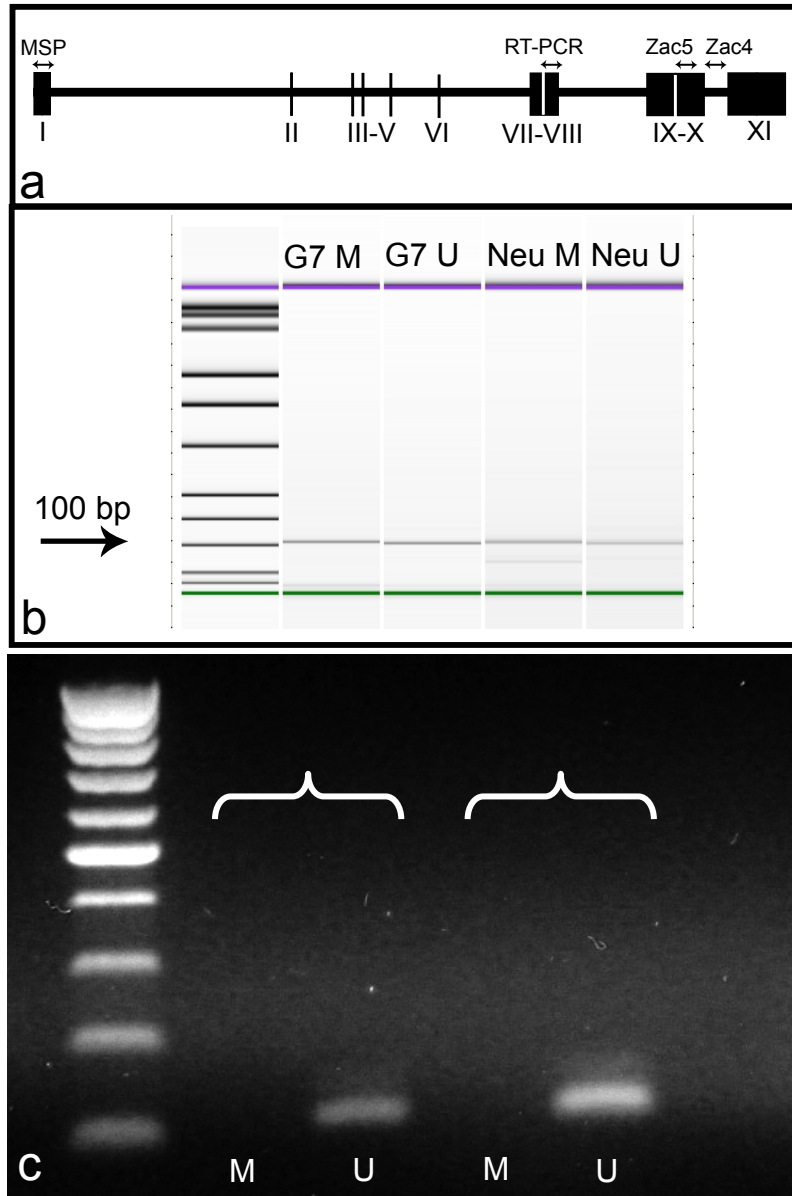

Supplement: NIHMS141534-supplement-Supplementary_Figure_1.pdf [file NIHMS141534-supplement-Supplementary_Figure_1.pdf]

# Suppl. Fig. 3

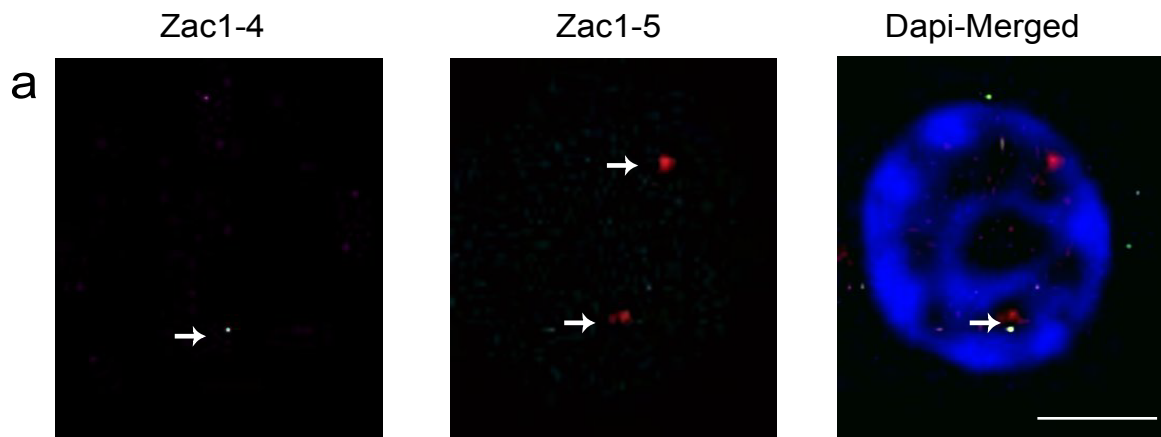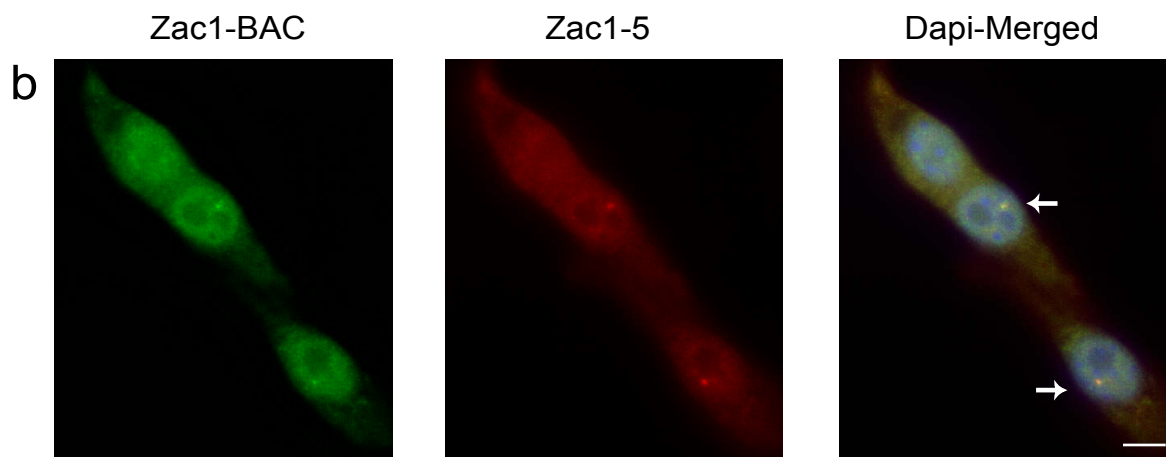

Supplement: NIHMS141534-supplement-Supplementary_Figure_3.pdf [file NIHMS141534-supplement-Supplementary_Figure_3.pdf]

Suppl. Fig. 4

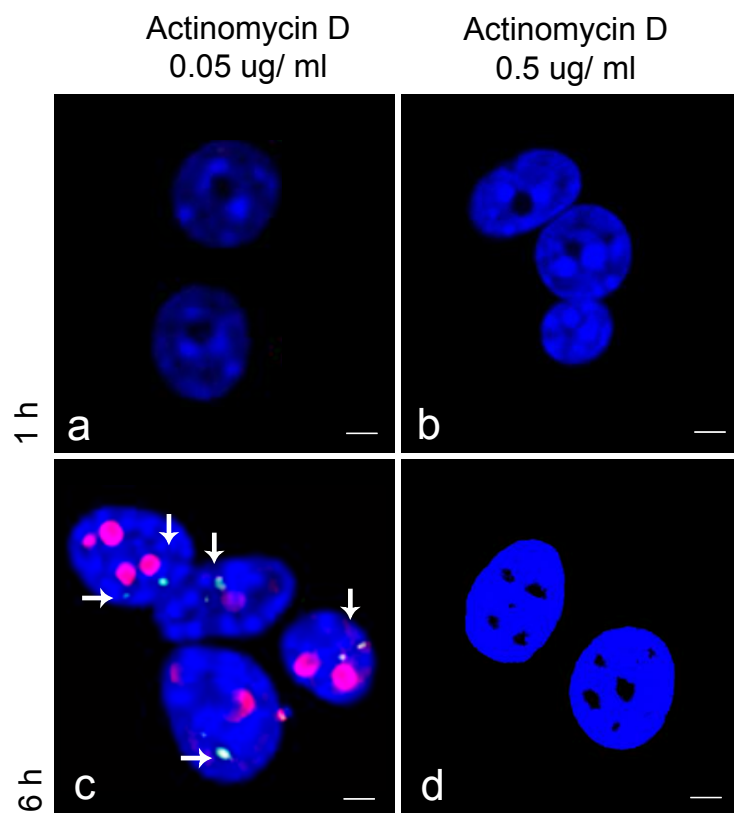

Supplement: NIHMS141534-supplement-Supplementary_Figure_4.pdf [file NIHMS141534-supplement-Supplementary_Figure_4.pdf]
